# Supplementary material for: Fabrication of Co3O4 nanoparticles in thin porous carbon shells from metal–organic frameworks for enhanced electrochemical performance
Source: Royal Society of Chemistry journal article supplement (doi:10.1039/c6ra28296b), 2017-01-01
Supplement: c6ra28296b1.pdf [file c6ra28296b1.pdf]

## Supporting Information for

# Fabrication of $\text{Co}_3\text{O}_4$ Nanoparticles in Thin Porous Carbon shell from Metal-Organic Frameworks for Enhanced Electrochemical Performance

*Bin Qiu<sup>a</sup>, Wenhan Guo<sup>a</sup>, Zibin Liang<sup>a</sup>, Wei Xia<sup>a</sup>, Song Gao<sup>a</sup>, Qingfei Wang<sup>a</sup>,  
Xiaofeng Yu<sup>a</sup>, Ruo Zhao<sup>a</sup> and Ruqiang Zou<sup>a\*</sup>*

B. Qiu, W. Guo, Q. Wang, Prof. R. Zou

[a] Beijing Key Laboratory for Theory and Technology of Advanced Battery  
Materials, Department of Materials Science and Engineering, College of Engineering,  
Peking University, Beijing 100871, P. R. China

E-mail: [rzou@pku.edu.cn](mailto:rzou@pku.edu.cn)

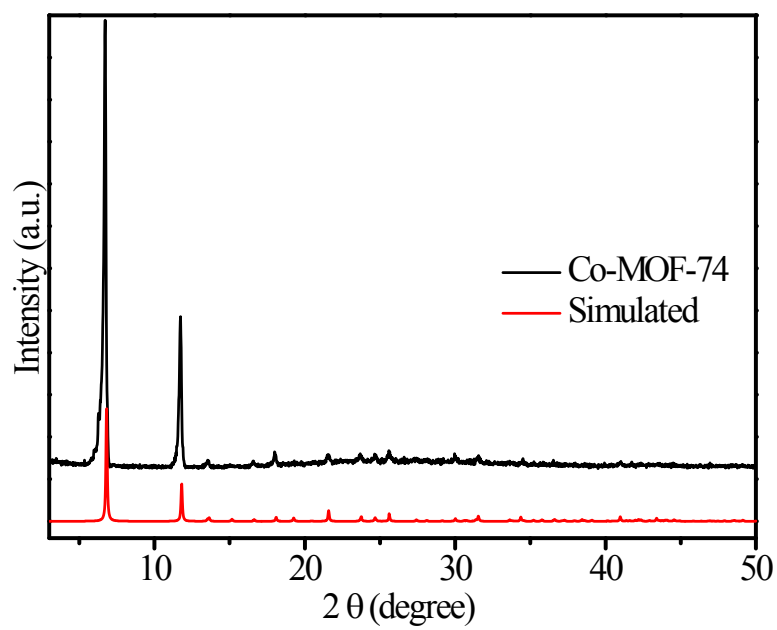

Fig. S1. XRD patterns of as-synthesized Co-MOF-74.

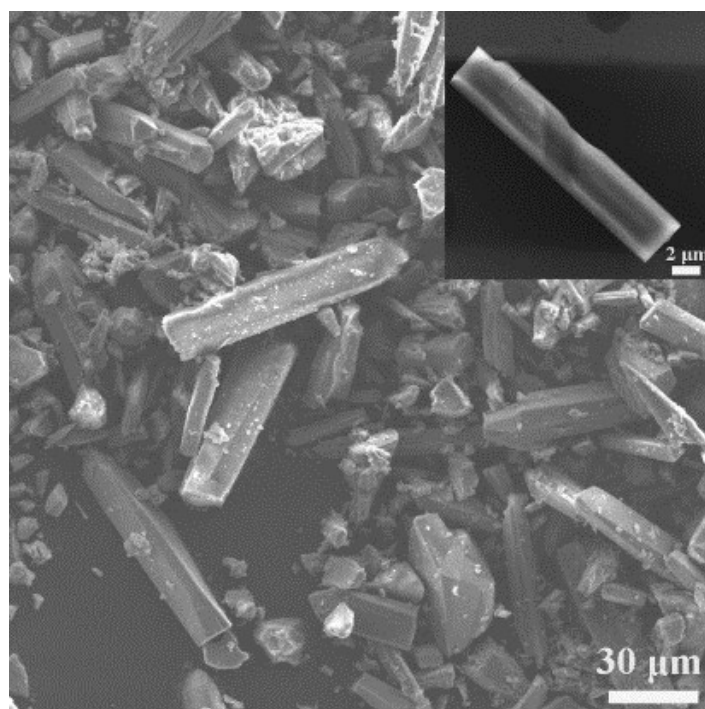

Fig. S2. SEM images of nanorod Co-MOF-74 synthesized by hydrothermal method.

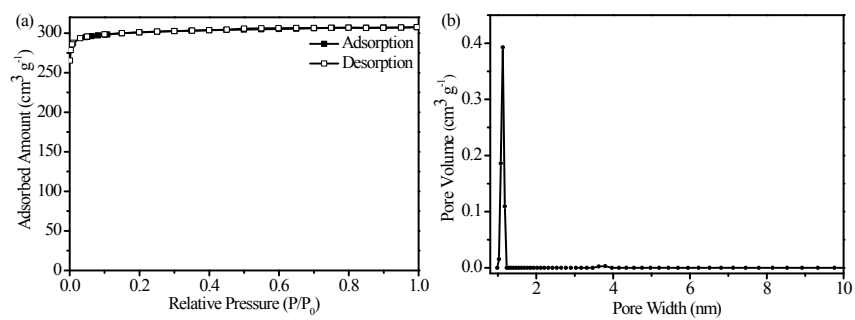

Fig. S3. (a) N<sub>2</sub> sorption/desorption isotherms, and (b) pore size distribution of the as-synthesized Co-MOF-74 nanorods.

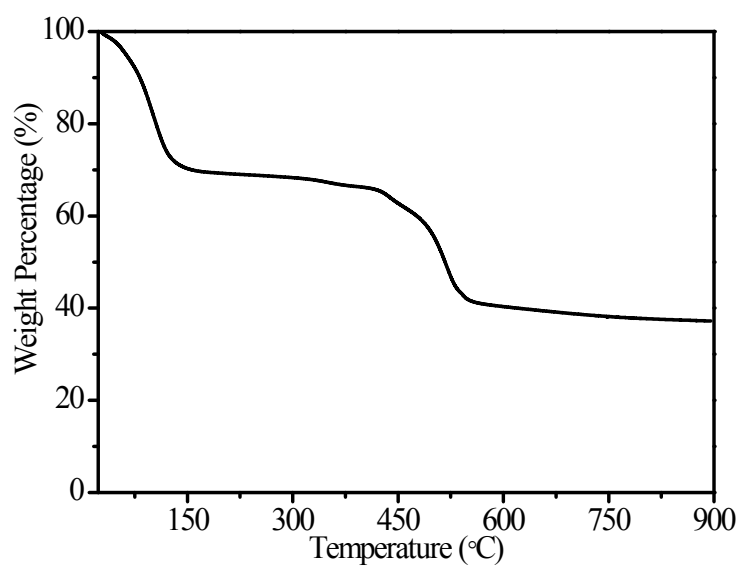

Fig. S4. Thermogravimetric analysis (TGA) result of Co-MOF-74 under N<sub>2</sub>.

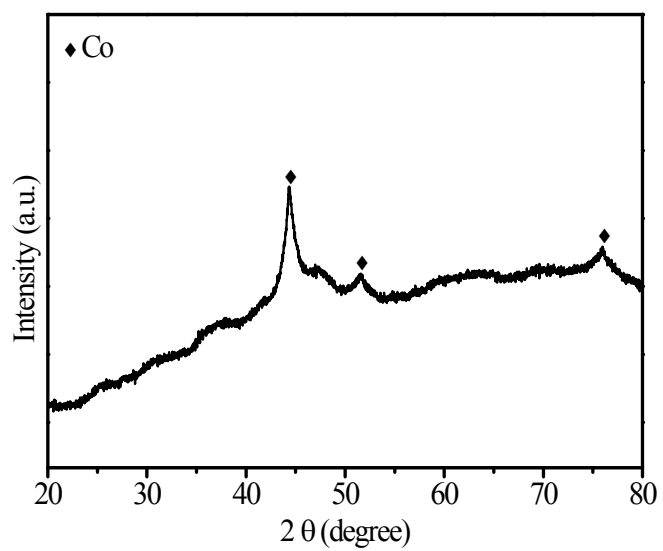

Fig. S5. XRD patterns of Co@C nanocomposites.

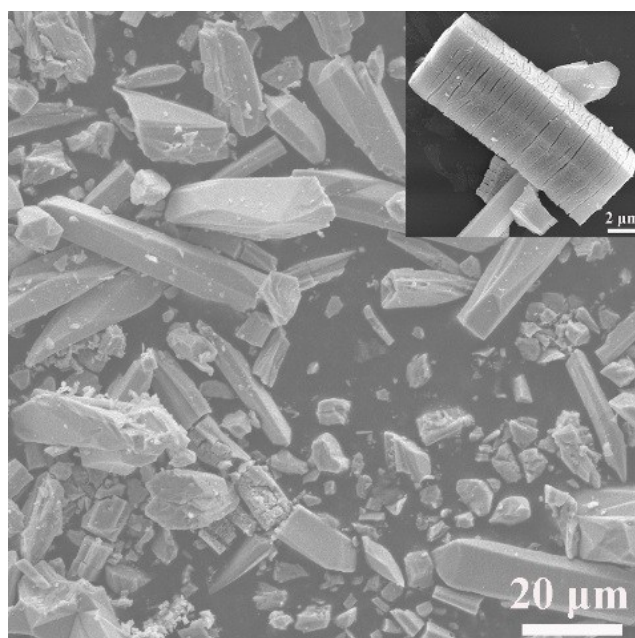

Fig. S6. SEM images of as-synthesized Co@C nanocomposites.

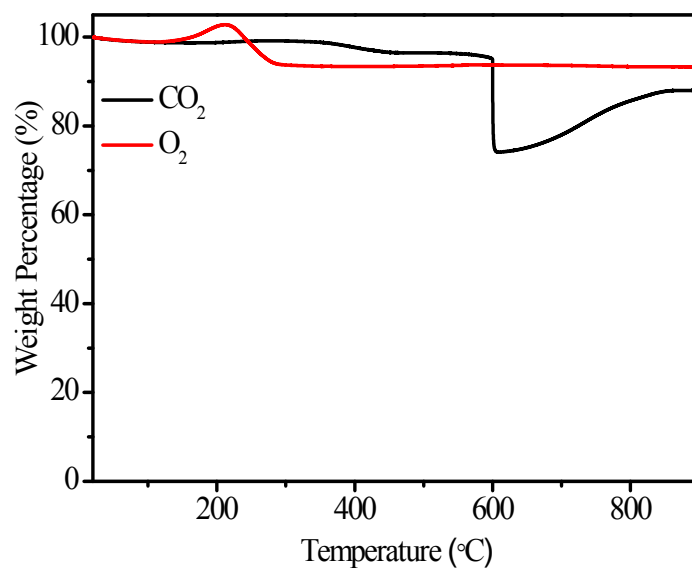

Fig. S7. Thermogravimetric analysis (TGA) result of Co@C composites under CO<sub>2</sub> and Air atmosphere.

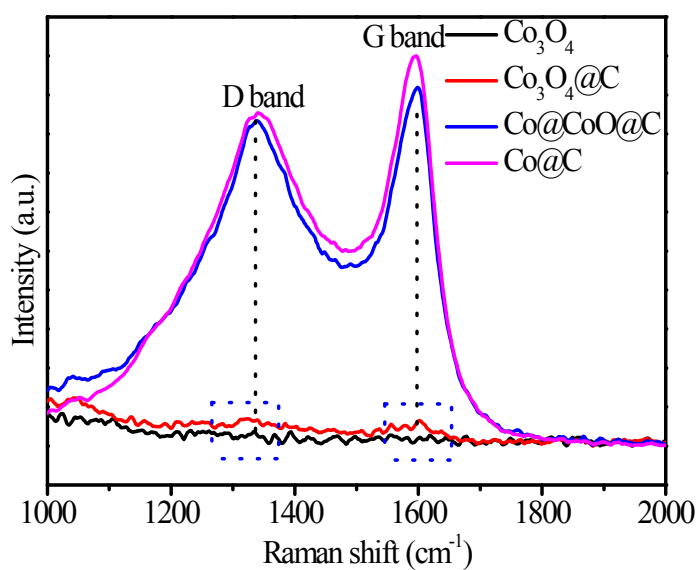

Fig. S8. Raman spectrum of as-synthesized Co@C, Co<sub>3</sub>O<sub>4</sub>, Co@CoO@C and Co<sub>3</sub>O<sub>4</sub>@C composites.

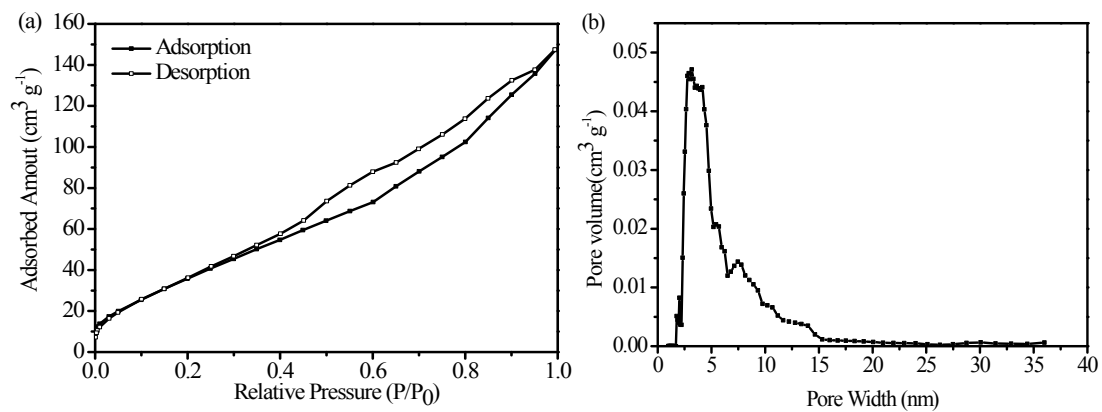

Fig. S9. (a) N<sub>2</sub> sorption/desorption isotherms, and (b) pore size distribution of the as-synthesized.

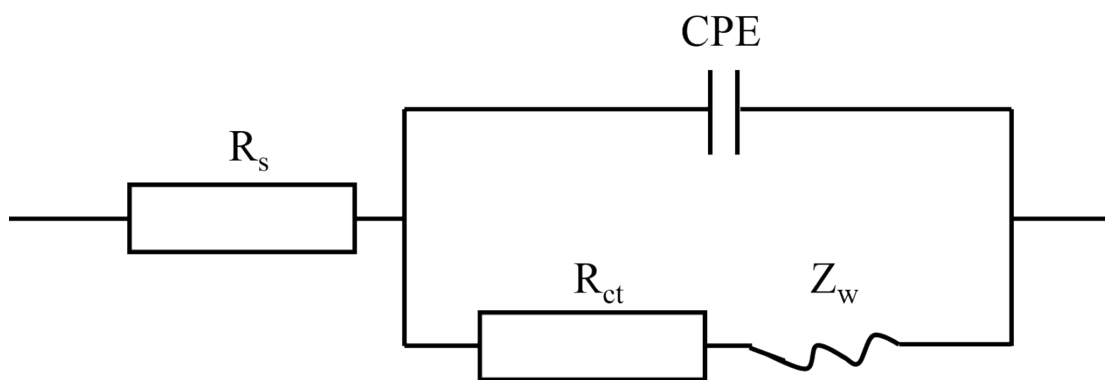

Fig. S10 The equivalent-circuit model of three samples for as-prepared batteries.

Table S1. The carbon content in the obtained samples from element analysis

| Samples                           | C (wt%) |
|-----------------------------------|---------|
| Co@C                              | 12.38   |
| Co <sub>3</sub> O <sub>4</sub>    | 0.15    |
| Co@CoO@C                          | 10.7    |
| Co <sub>3</sub> O <sub>4</sub> @C | 3.17    |

Table S2. Comparison of the capacity of present work with the reported Co<sub>3</sub>O<sub>4</sub>@C electrode materials derived from metal organic frameworks

| Samples                                             | Current density        | Cycle number | Capacity                 | Ref.      |
|-----------------------------------------------------|------------------------|--------------|--------------------------|-----------|
| Co <sub>3</sub> O <sub>4</sub> hollow dodecahedrons | 100 mA g <sup>-1</sup> | 100          | 1355 mAh g <sup>-1</sup> | 1         |
| Co <sub>3</sub> O <sub>4</sub> hollow dodecahedra   | 100 mA g <sup>-1</sup> | 100          | 780 mAh g <sup>-1</sup>  | 2         |
| Co <sub>3</sub> O <sub>4</sub> nanoparticles        | 50 mA g <sup>-1</sup>  | 50           | 965 mAh g <sup>-1</sup>  | 3         |
| Co <sub>3</sub> O <sub>4</sub> composites           | 200 mA g <sup>-1</sup> | 60           | 913 mAh g <sup>-1</sup>  | 4         |
| MWCNTs/Co <sub>3</sub> O <sub>4</sub> nanocomposite | 100 mA g <sup>-1</sup> | 100          | 813 mAh g <sup>-1</sup>  | 5         |
| Co <sub>3</sub> O <sub>4</sub> /C nanosheets        | 100 mA g <sup>-1</sup> | 100          | 1082 mAh g <sup>-1</sup> | 6         |
| Co <sub>3</sub> O <sub>4</sub> @C composites        | 100 mA g <sup>-1</sup> | 100          | 1137 mAh g <sup>-1</sup> | This work |

- 1 J. Shao, Z. M Wan, H. M. Liu, H. Y. Zheng, T. Gao, M. Shen, Q. T. Qu and H. H. Zheng, *J. Mater. Chem. A*, 2014, **2**, 12194-12200.
- 2 R. B. Wu , X. K. Qian , X. H. Rui , H. Liu , B. L. Ya, K. Zhou, J. Wei ,Q. Y. Yan, X. Q. Feng, Y. Long , L. Y. Wang and Y. Z. Huang, *Small*, 2014, **10**, 1932-1938.
- 3 B. Liu, X. B. Zhang, H. Shioyama, T. Mukaia, T. Sakaia and Q. Xu, *J. Power Sources*, 2010, **195**, 857-861.
- 4 C. Li, T. Q. Chen, W. J. Xu, X. B. Lou, L. K. Pan, Q. Chen and B. W. Hu, *J. Mater.*

*Chem. A*, 2015, **3**, 5585-5591.

5 G. Huang, F. F. Zhang, X. C. Du, Y. L. Qin, D. M. Yin and L. M. Wang, *ACS Nano*, 2015, 9, **2**, 1592-1599.

6 W. Liu, H. Z. Yang, L. Zhao, S. Liu, H. L. Wang, S. G. Chen, *Electrochim. Acta*, 2016, **207**, 293-300.
